# Supplementary material for: Enhanced synergistic catalysis by a novel triple-phase interface design of NiO/Ru@Ni for the hydrogen evolution reaction
Source: Royal Society of Chemistry journal article supplement (doi:10.1039/c8ta11171e), 2019-01-01
Supplement: c8ta11171e1.pdf [file c8ta11171e1.pdf]

## Electronic Supplementary Information (ESI)

### Enhanced Synergistic Catalysis by Novel Triple-phase Interfaces Design of NiO/Ru@Ni for Hydrogen Evolution Reaction

Chenglin Zhong,<sup>‡a</sup> Qingwen Zhou,<sup>‡a</sup> Shengwen Li,<sup>a</sup> Lin Cao,<sup>a</sup> Jiachen Li,<sup>b</sup> Zihan Shen,<sup>a</sup> Haixia Ma,<sup>b</sup> Jianguo Liu,<sup>a</sup> Minghui Lu<sup>a</sup> and Huigang Zhang<sup>\*a</sup>

<sup>a</sup>National Laboratory of Solid State Microstructures, College of Engineering and Applied Sciences, and Collaborative Innovation Center of Advanced Microstructures, Nanjing University, Nanjing 210093, P.R. China.

\*E-mail: hgzhang@nju.edu.cn

<sup>b</sup>Department of Chemical Engineering, Northwest University, Xi'an 710069, P. R. China

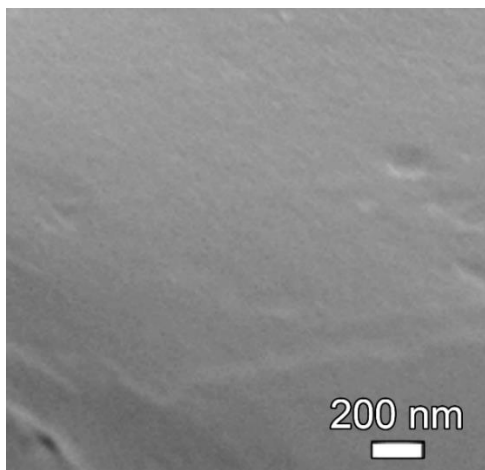

**Fig. S1** SEM images of PNS.

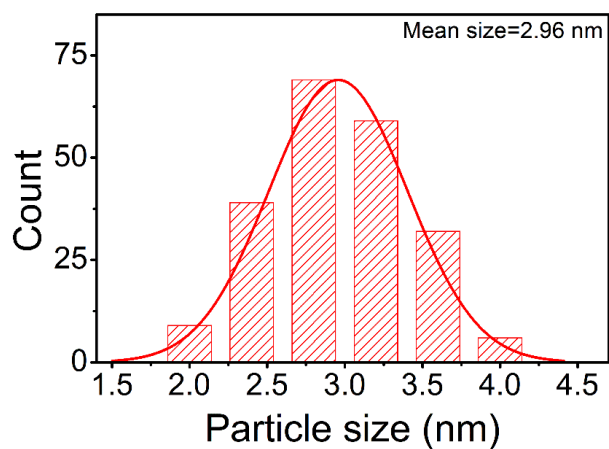

**Fig. S2** The particle size distribution of Ru nanoparticles in NiO/Ru@PNS.

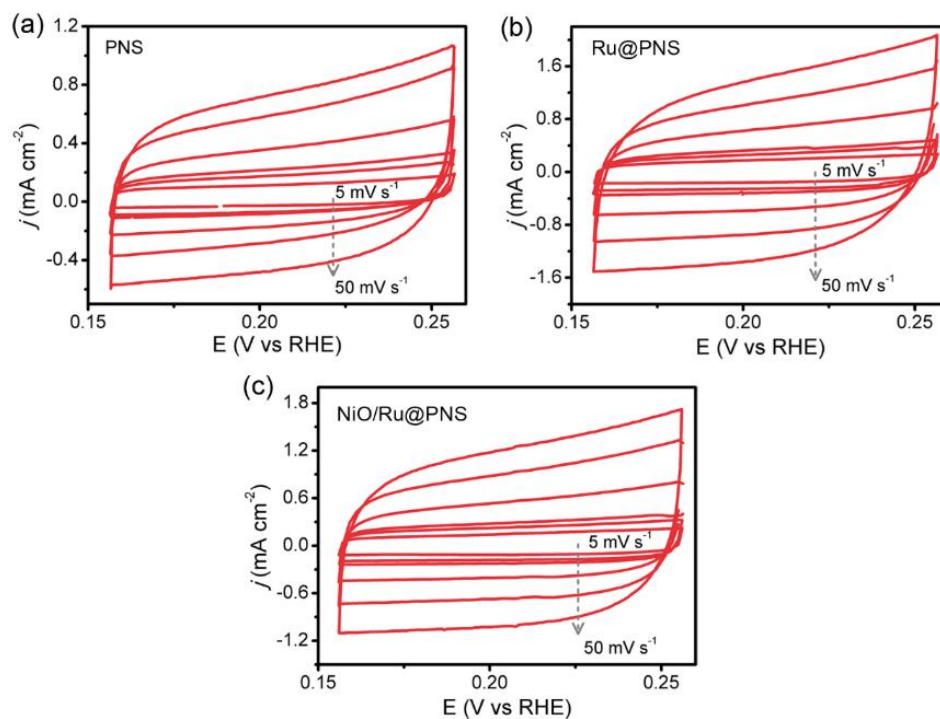

**Fig. S3** Cyclic voltammograms of as-prepared catalysts at different scanning rates of 5, 8, 10, 20, 35, and 50  $\text{mV s}^{-1}$ : (a) PNS, (b) Ru@PNS, and (c) NiO/Ru@PNS.

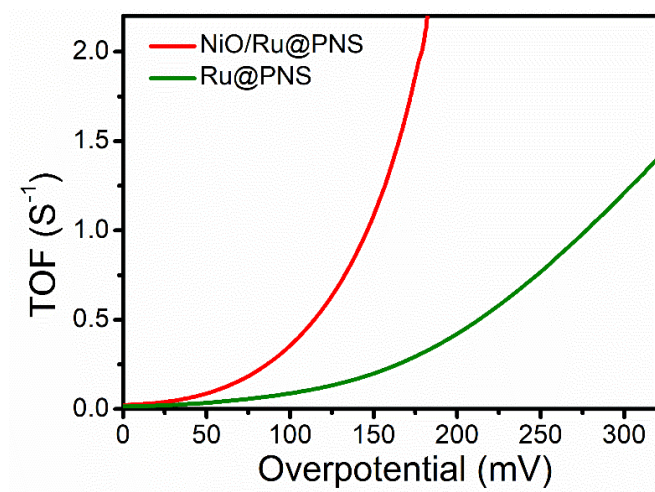

**Fig. S4** TOFs of NiO/Ru@PNS and Ru@PNS at different overpotential.

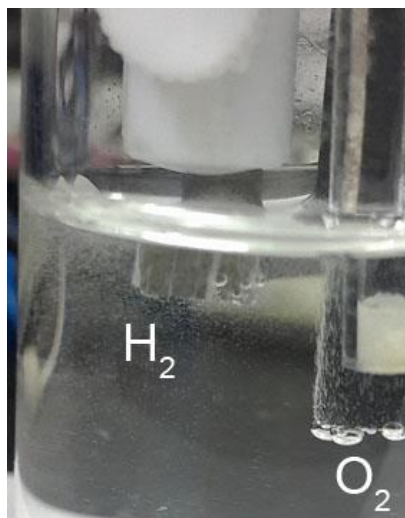

**Fig. S5** Optical photograph shows the bubble generation at  $-200 \text{ mA cm}^{-2}$ .

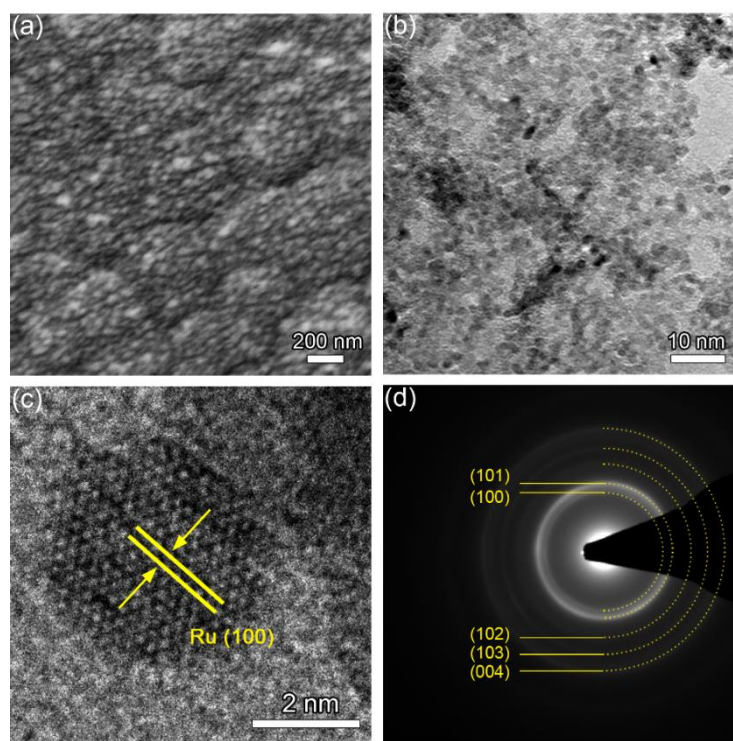

**Fig. S6** (a) SEM image of the NiO/Ru@PNS electrode surface after 80 h electrolysis. (b) TEM image, (c) HRTEM image, and (d) SAED of the obtained Ru nanoparticles from the NiO/Ru@PNS sample after the 80 h electrolysis.

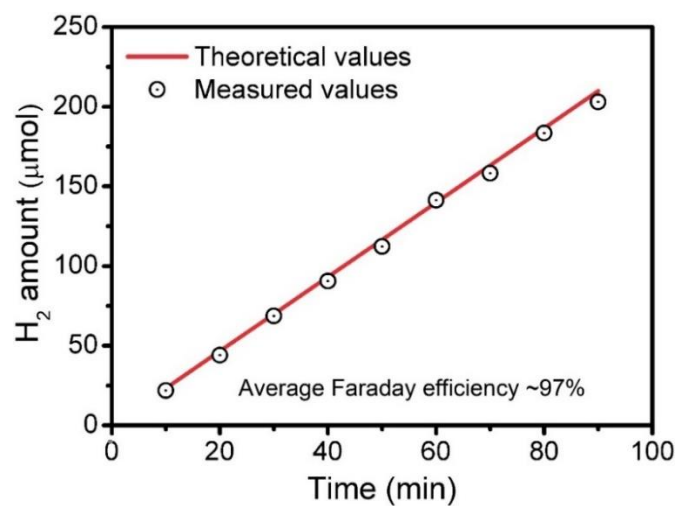

**Fig. S7** Faradaic efficiency of NiO/Ru@PNS for HER.

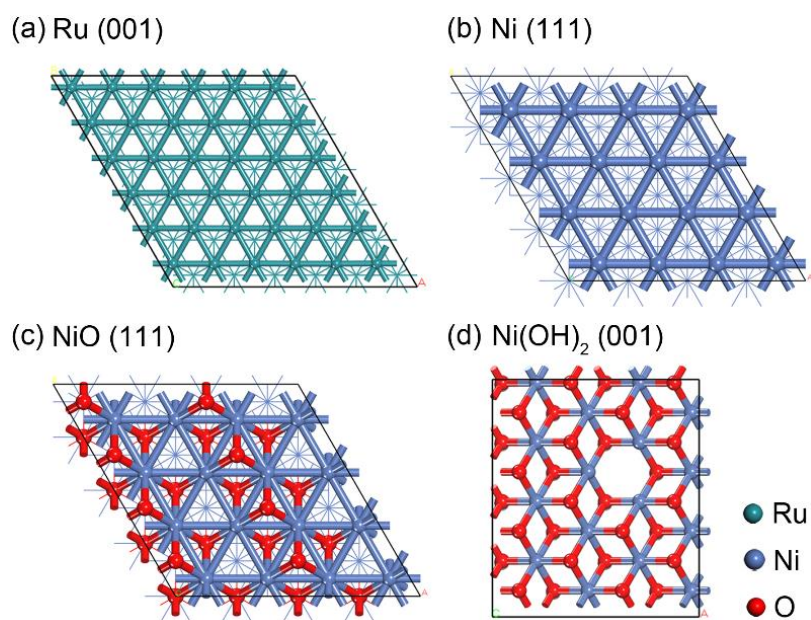

**Fig. S8** The as-built catalyst models for the DFT calculations.

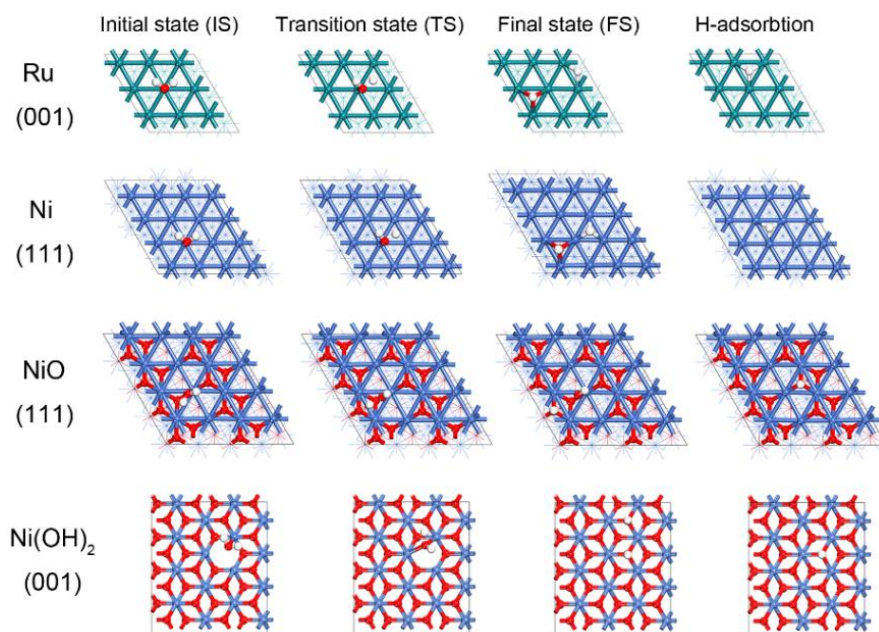

**Fig. S9** Initial state (IS), transition state (TS), final state (FS) for water dissociation, and H adsorption on Ru (001), Ni (111), NiO (111), and Ni(OH)<sub>2</sub> (001) facets, respectively.

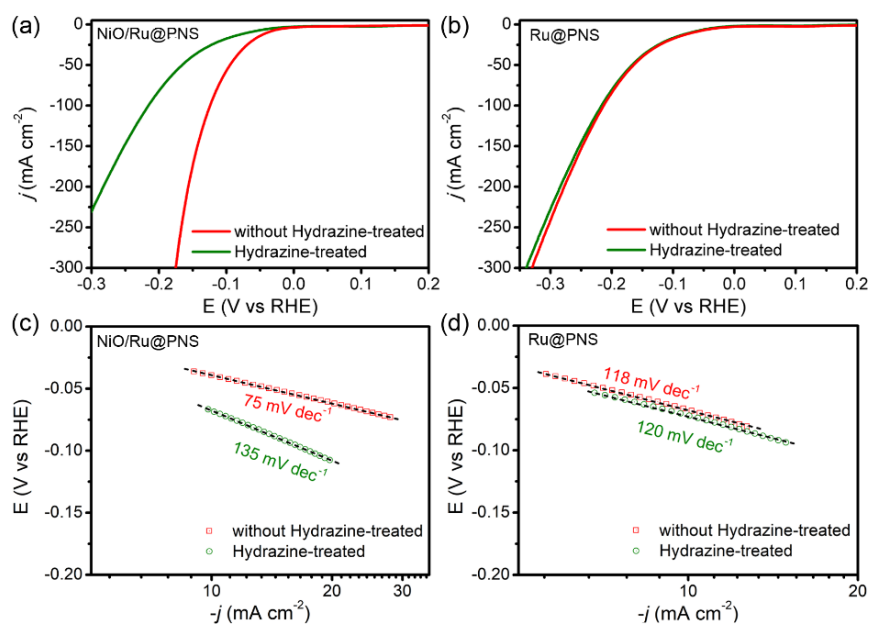

**Fig. S10** LSV polarization curves of (a) NiO/Ru@PNS and (b) Ru@PNS before and after the hydrazine reduction process. Corresponding Tafel plots of (c) NiO/Ru@PNS and (d) Ru@PNS before and after the hydrazine reduction process.

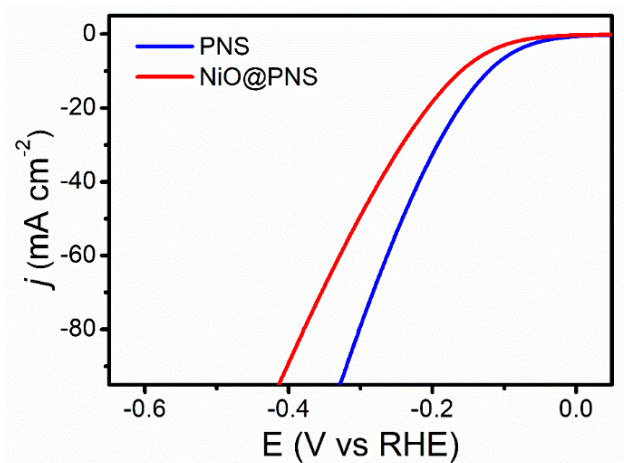

**Fig. S11** LSV polarization curves of PNS before and after the in-situ electro-oxidation process.

**Table S1.** Comparison of electrocatalytic HER activity of most recently reported HER catalysts in alkaline media.

| Catalysts | Current density | Corresponding overpotential | Tafel slope (mV dec <sup>-1</sup> ) | Stability test (h) | Ref. |
|-----------|-----------------|-----------------------------|-------------------------------------|--------------------|------|
|-----------|-----------------|-----------------------------|-------------------------------------|--------------------|------|

|                                                  | $j$ (mA cm <sup>-2</sup> ) | $\eta$ (mV) |       |       |    |
|--------------------------------------------------|----------------------------|-------------|-------|-------|----|
| Cu NDs/Ni <sub>3</sub> S <sub>2</sub><br>NTs-CFs | -10                        | 128         | 76.2  | 30    | 1  |
|                                                  | -50                        | 212         |       |       |    |
|                                                  | -100                       | 260         |       |       |    |
| MoS <sub>2</sub> /NiCo-LDH on<br>CFP             | -10                        | 78          | 118   | 48    | 2  |
| NiFe-LDH-Pt-ht/CC                                | -10                        | 101         | 127   | 9     | 3  |
|                                                  | -50                        | 205         |       |       |    |
| NiS <sub>2</sub> /MoS <sub>2</sub> HNW           | -10                        | 204         | 65    | 6     | 4  |
| TiO <sub>2</sub> NDs/Co<br>NSNTs-CFs             | -10                        | 108         | 62    | 30    | 5  |
|                                                  | -50                        | 195         |       |       |    |
|                                                  | -100                       | 235         |       |       |    |
| Pt <sub>3</sub> Ni <sub>3</sub> NWS/C            | -10                        | 40          | /     | 3     | 6  |
| Ni <sub>3</sub> N/Pt/Ni mesh                     | -10                        | 50          | /     | 24    | 7  |
| Ni <sub>3</sub> FeN/r-GO                         | -10                        | 94          | 90    | 10    | 8  |
| NC@CuCo <sub>2</sub> Nx/CF                       | -10                        | 105         | 76    | /     | 9  |
| Co-N <sub>x</sub> P-GC/FEG                       | -10                        | 260         | 115   | 10    | 10 |
|                                                  | -20                        | 300         |       |       |    |
| N-Ni <sub>3</sub> S <sub>2</sub> /NF             | -10                        | 110         | /     | ~3    | 11 |
| o-CoSe <sub>2</sub> P                            | -10                        | 104         | 69    | 20    | 12 |
| MoS <sub>2</sub> /Ni(OH) <sub>2</sub>            | -10                        | 185         | 73    | 20    | 13 |
| MoS <sub>2</sub> /FNS/FeNi                       | -10                        | 122         | 45.1  | 10    | 14 |
|                                                  | -20                        | 210         |       |       |    |
| Co <sub>1</sub> Mn <sub>1</sub> CH               | -10                        | 180         | /     | 10    | 15 |
|                                                  | -50                        | 281         |       |       |    |
|                                                  | -100                       | 328         |       |       |    |
| S-NiFe <sub>2</sub> O <sub>4</sub> /NF           | -10                        | 138         | 61.3  | /     | 16 |
| Ni-BDT-A                                         | -10                        | 80          | 70    | 20    | 17 |
|                                                  | -100                       | 150         |       |       |    |
| Mo <sub>2</sub> N-Mo <sub>2</sub> C/HGr-3        | -10                        | 154         | 78    | 50    | 18 |
|                                                  | -100                       | 361         |       |       |    |
| W-SAC                                            | -10                        | 85          | 53    | ~66.6 | 19 |
| Ni@NC-800                                        | -10                        | 205         | 160   | 10    | 20 |
| FeB <sub>2</sub> NPs                             | -10                        | 61          | 102.4 | 24    | 21 |
|                                                  | -20                        | 82          |       |       |    |

|                          |      |     |      |    |                  |
|--------------------------|------|-----|------|----|------------------|
|                          | -100 | 172 |      |    |                  |
| NFN-MOF/NF               | -10  | 87  | 35.2 | 30 | 22               |
| NiFeSP/NF                | -10  | 94  | 82.6 | 25 | 23               |
|                          | -50  | 150 |      |    |                  |
| Ni(OH) <sub>2</sub> @CuS | -10  | 150 | 24.2 | 24 | 24               |
|                          | -10  | 39  |      |    |                  |
| NiO/Ru@PNS               | -50  | 94  | 75   | 80 | <b>This work</b> |
|                          | -100 | 124 |      |    |                  |
|                          | -200 | 157 |      |    |                  |
|                          |      |     |      |    |                  |

### Supplemental Information Note S1: Calculation of double-layer capacitance ( $C_{dl}$ ).

The  $C_{dl}$  was used to determine the electrochemically active surface area (ECSA) of each electrode according to the reference.<sup>25</sup> To measure the value of  $C_{dl}$ , the potential was swept between 0.157 and 0.257 V versus the reversible hydrogen electrode (RHE) at varied scan rates. A potential range of 0.157~0.257 V was selected for the capacitance measurements because no obvious faradaic reactions can be observed in this region. The capacitive currents of  $\Delta J_{I_{Ja}-I_{Jc}}@_{\omega} V/2$  are plotted with respect to the cyclic voltammetry (CV) scan rates. The data are fitted to a line, whose slope is the  $C_{dl}$ . The  $C_{dl}$  is proportional to the surface area of electrode.

The ECSA of a catalyst can be calculated from the  $C_{dl}$  according equation S1:<sup>2-4</sup>

$$ECSA = \frac{C_{dl}}{C_s} \quad (S1)$$

where  $C_s$  is the capacitance of the sample of an atomically smooth planar surface of material per unit area under identical electrolyte conditions. Here we use general specific capacitance of  $C_s=0.04 \text{ mF cm}^{-2}$  in 1 M KOH based on typical reported values.<sup>26,27</sup>



### **Supplemental Information Note S2: Calculation of turn over frequency (TOF).**

The TOF values can be calculated by the equation  $TOF = I/2nF$ , where these physical variables  $F$ ,  $n$ , and  $I$  are corresponding to the Faraday constant ( $\sim 96485$  C/mol), the number of active sites (mol), and the current (A) during the LSV measurement in 1 M KOH, respectively. The factor 1/2 is due to fact that two electrons are required to form one hydrogen molecule from two protons.

The number of active sites was determined by an electrochemical method.<sup>28-31</sup> The CV curves were carried out in the potential range of -0.2–0.6 V vs RHE with a scan rate of 50 mV s<sup>-1</sup> in 1M PBS electrolyte (pH = 7). Due to the difficulty in assigning the observed peaks to a given redox couple, the number of active sites is nearly proportional to the integrated voltammetric charges (cathodic and anodic) over the CV curves. Supposing a one electron process for both reduction and oxidation, we can get the upper limit of the number of active sites ( $n$ ) based on the equation  $n = Q/2F$ , where  $F$  and  $Q$  are the Faraday constant and the whole charge of CV curve, respectively. The resulting value is the number of active sites of the catalyst.

### **Supplemental Information Note S3: H<sub>2</sub> quantification and Faraday efficiency.**

Faraday efficiencies of the HER were calculated by the ratio of the actual amount of evolved H<sub>2</sub> to the theoretical amount of H<sub>2</sub>.<sup>32,33</sup> H<sub>2</sub> was collected by a water drainage method and its amount (in mol) was then calculated using the ideal gas law.<sup>34,35</sup> The theoretical H<sub>2</sub> amount is determined by assuming that 100% electrolysis efficiency. Fig. S6 shows the experimental and theoretical amounts of H<sub>2</sub> after 90 min electrolysis.

### **Supplemental Information Note S4: The density functional theory (DFT) Computational details.**

The DFT studies were performed by using the Vienna *Ab initio* Simulation Package (VASP)<sup>36,37</sup> along with the projector augmented wave (PAW)<sup>38</sup> method. The generalized gradient approximation (GGA)<sup>39</sup> functional with the Perdew-Burke-Emzerhof formulation was adopted to describe the exchange-correlation interaction among electrons, and we used an energy cutoff of 450 eV for the plane wave expansion. A semi-empirical van der waals (vdW)<sup>40,41</sup> correction (optB86b-vdW) for the dispersion interactions was considered. More than 10 Å thick slabs with 16 Å of vacuum along the z-direction were used to model for calculation of the surface so that these systems were large enough to avoid artificial

interaction caused by periodicity. The convergence threshold was set as  $10^{-5}$  eV per unit cell in energy and  $0.05$  eV/Å per atom in force. The CI-NEB<sup>42</sup> is applied for computing decomposition barriers, which is an improved algorithm of the traditional NEB method.

The hydrogen evolution reaction (HER) activity over a given system is correlated to the adsorption energy of a single H atom on the system. Thus, the free energy of  $H^*$ ,  $\Delta G(H^*)$ , can be considered as an effective descriptor for evaluating HER activity, which is defined as<sup>43</sup>,

$$\Delta G(H^*) = \Delta E(H^*) + \Delta ZPE - T\Delta S$$

Where  $\Delta E(H^*)$  is the binding energy of H atom and possible adsorption sites,  $\Delta ZPE$  is the zero point energy change of  $H^*$  by using the equation of  $\Delta ZPE = ZPE(H^*) - 1/2ZPE(H_2)$  with a value of  $ZPE(H_2) = 0.230$  eV.  $T\Delta S$  is the entropy change of  $H^*$ , which is determined to be  $-0.20$  eV at 298 K and 1 atm.

#### **Supplemental Information Note S5: Kinetic analysis based on the dual-pathway kinetic model.**

HER kinetic analyses of Ru@PNS and NiO/Ru@PNS were performed according the procedure of Yang and Wang *et al.*<sup>2,44-46</sup> Based on the Volmer-Tafel-Heyrovsky mechanism, the HER/HOR on the catalysts' surfaces undergoes a multistep reaction process, which is suggested as two different mechanisms with triple possible reactions. In acidic solution, the reactions are shown as below:

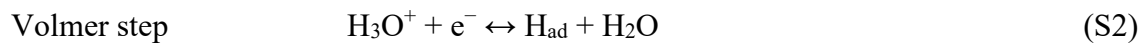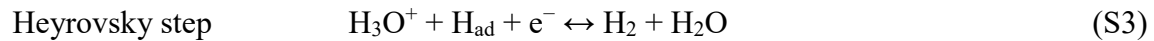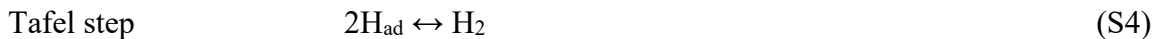

In alkaline solution:

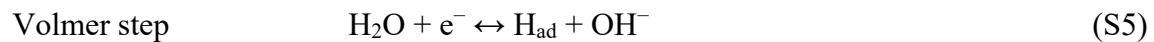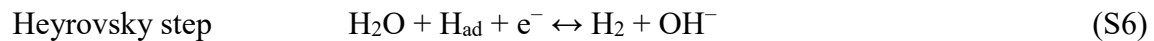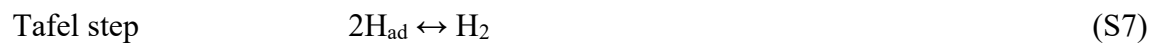

Because the adsorbed reaction intermediate is the same in acid and alkali, the formula of the dual-pathway model (Volmer-Heyrovsky or Volmer-Tafel) is the same for HER in both electrolytes. Based

on the two dual-pathway models, we performed kinetic analyses to evaluate the standard activation free energies for the triple elementary reaction steps of HER.

Under steady-state conditions,  $d\theta/dt = 2v_T + v_H - v_V = 0$  ( $2v_T + v_H = v_V$ ), where  $\theta$  is the surface coverage of the active reaction intermediate, and  $v$  is the reaction rate. The current density is directly proportional to the sum of the reaction rates for the two single electron-transfer reactions ( $v_H$  and  $v_V$ ). Thus, the total kinetic currents ( $j_k$ ) can be expressed by the currents of any two elementary reactions, wherein  $j_i = 2Fv_i$ :

$$\begin{aligned} j_k &= F(v_V + v_H) = 2F(v_T + v_H) = 2F(v_V - v_T) \\ &= (j_V + j_H)/2 = j_T + j_H = j_V - j_T \end{aligned} \quad (\text{S8})$$

The kinetic currents using the activation free energies and the adsorption free energies as the adjustable parameters for each individual step are:

$$j_T = j_{+T} - j_{-T} = j^* e^{-\Delta G_{+T}^*/kT} \left[ (1-\theta)^2 - e^{2\Delta G_{ad}^0/kT} \theta^2 \right] \quad (\text{S9})$$

$$j_H = j_{+H} - j_{-H} = j^* e^{-\Delta G_{+H}^*/kT} \left[ e^{0.5\eta/kT} (1-\theta) - e^{\Delta G_{ad}^0 - 0.5\eta/kT} \theta \right] \quad (\text{S10})$$

$$j_V = j_{+V} - j_{-V} = j^* e^{-\Delta G_{+V}^*/kT} \left[ e^{(\Delta G_{ad}^0 + 0.5\eta)/kT} \theta - e^{-0.5\eta/kT} (1-\theta) \right] \quad (\text{S11})$$

where  $\Delta G_{ad}^0$  is the standard free energy of adsorption for the reaction intermediate, i.e., Had, and  $\Delta G_i^*$  is the standard activation free energy for the triple elementary reaction steps ( $\Delta G_{+T}^*$  for Tafel step,  $\Delta G_{+H}^*$  for Heyrovsky step, and  $\Delta G_{+V}^*$  for Volmer step).  $kT = 25.51$  meV at 300 K.

To find the adsorption isotherm,  $\theta(\eta)$ , we let  $g_i = e^{-\Delta G_i^*/kT}$ . Combing the steady-state equation,  $d\theta/dt = 2v_T + v_H - v_V = 0$ , with Eqs. S8-10 leads to

$$2g_{+T}(1-\theta)^2 - 2g_{-T}\theta^2 + g_{+H}(1-\theta) - g_{-H}\theta = g_{+V}\theta - g_{-V}(1-\theta) \quad (\text{S12})$$

where

$$g_{+T} = e^{-\Delta G_{+T}^*/kT} = e^{-\Delta G_{+T}^*/kT} \quad (\text{S13})$$

$$g_{-T} = e^{-\Delta G_{-T}^*/kT} = e^{-(\Delta G_{+T}^* + 2\Delta G_{ad}^0)/kT} \quad (\text{S14})$$

$$g_{+H} = e^{-\Delta G_{+H}^*/kT} = e^{-(\Delta G_{+H}^{*0}-0.5\eta)/kT} \quad (\text{S15})$$

$$g_{-H} = e^{-\Delta G_{-H}^*/kT} = e^{-(\Delta G_{-H}^{*0}-\Delta G_{ad}^0+0.5\eta)/kT} \quad (\text{S16})$$

$$g_{+V} = e^{-\Delta G_{+V}^*/kT} = e^{-(\Delta G_{+V}^{*0}-\Delta G_{ad}^0-0.5\eta)/kT} \quad (\text{S17})$$

$$g_{-V} = e^{-\Delta G_{-V}^*/kT} = e^{-(\Delta G_{-V}^{*0}+0.5\eta)/kT} \quad (\text{S18})$$

Equation S11 can be rearranged into a quadratic equation,  $A\theta^2 + B\theta + C = 0$ , where

$$A = 2g_{+T} - 2g_{-T} \quad (\text{S19})$$

$$B = -4g_{+T} - g_{+H} - g_{-H} - g_{+V} - g_{-V} \quad (\text{S20})$$

$$C = 2g_{+T} + g_{+H} + g_{-V} \quad (\text{S21})$$

Thus, the equations for calculating the adsorption isotherm,  $\theta$ , are given below:

$$\theta = \frac{-B - \sqrt{B^2 - 4AC}}{2A} \quad (\text{S22})$$

The kinetic current,  $j_k(\eta) = f(\Delta G_{-V}^{*0}, \Delta G_{+H}^{*0}, \Delta G_{+T}^{*0}, \Delta G_{ad}^0, j^*, \theta)$ , can be determined by Eqs. S8-11,

where the adsorption isotherm,  $\theta(\eta) = f(\Delta G_{-V}^{*0}, \Delta G_{+H}^{*0}, \Delta G_{+T}^{*0}, \Delta G_{ad}^0)$ , is obtained from Eqs. S12-22.

### Supplementary References:

- 1 J. X. Feng, J. Q. Wu, Y. Tong and G. R. Li, *J. Am. Chem. Soc.*, 2018, **140**, 610–617.
- 2 J. Hu, C. Zhang, L. Jiang, H. Lin, Y. An, D. Zhou, M. K. H. Leung and S. Yang, *Joule*, 2017, **1**, 383–393.
- 3 S. Anantharaj, K. Karthick, M. Venkatesh, T. V. S. V. Simha, A. S. Salunke, L. Ma, H. Liang and S. Kundu, *Nano Energy*, 2017, **39**, 30–43.
- 4 P. Kuang, T. Tong, K. Fan and J. Yu, *ACS Catal.*, 2017, **7**, 6179–6187.
- 5 J. X. Feng, H. Xu, Y. T. Dong, X. F. Lu, Y. X. Tong and G. R. Li, *Angew. Chem., Int. Ed.*, 2017, **56**, 2960–2964.
- 6 P. Wang, K. Jiang, G. Wang, J. Yao and X. Huang, *Angew. Chem., Int. Ed.*, 2016, **55**, 12859–12863.
- 7 Y. Wang, L. Chen, X. Yu, Y. Wang and G. Zheng, *Adv. Energy Mater.*, 2017, **7**, 1601390.
- 8 Y. Gu, S. Chen, J. Ren, Y. A. Jia, C. Chen, S. Komarneni, D. Yang and X. Yao, *ACS Nano*, 2018, **12**, 245–253.
- 9 J. Zheng, X. Chen, X. Zhong, S. Li, T. Liu, G. Zhuang, X. Li, S. Deng, D. Mei and J. G. Wang, *Adv. Funct. Mater.*, 2017, **27**, 1704169
- 10 Y. Hou, M. Qiu, T. Zhang, J. Ma, S. Liu, X. Zhuang, C. Yuan and X. Feng, *Adv. Mater.*, 2017, **29**, 1604480.

- 11 P. Chen, T. Zhou, M. Zhang, Y. Tong, C. Zhong, N. Zhang, L. Zhang, C. Wu and Y. Xie, *Adv. Mater.*, 2017, **29**, 1701584.
- 12 Y. R. Zheng, P. Wu, M. R. Gao, X. L. Zhang, F. Y. Gao, H. X. Ju, R. Wu, Q. Gao, R. You, W. X. Huang, S. J. Liu, S. W. Hu, J. Zhu, Z. Li and S. H. Yu, *Nat. Commun.*, 2018, **9**, 2533.
- 13 Z. Zhu, H. Yin, C. T. He, M. Al Mamun, P. Liu, L. Jiang, Y. Zhao, Y. Wang, H. G. Yang, Z. Tang, D. Wang, X. M. Chen and H. Zhao, *Adv. Mater.*, 2018, 1801171.
- 14 Y. Wu, F. Li, W. Chen, Q. Xiang, Y. Ma, H. Zhu, P. Tao, C. Song, W. Shang, T. Deng and J. Wu, *Adv. Mater.*, 2018, **30**, 1803151.
- 15 T. Tang, W. J. Jiang, S. Niu, N. Liu, H. Luo, Y. Y. Chen, S. F. Jin, F. Gao, L. J. Wan and J. S. Hu, *J. Am. Chem. Soc.*, 2017, **139**, 8320–8328.
- 16 J. Liu, D. Zhu, T. Ling, A. Vasileff and S. Z. Qiao, *Nano Energy*, 2017, **40**, 264–273.
- 17 C. Hu, Q. Ma, S. F. Hung, Z. N. Chen, D. Ou, B. Ren, H. M. Chen, G. Fu and N. Zheng, *Chem*, 2017, **3**, 122–133.
- 18 H. Yan, Y. Xie, Y. Jiao, A. Wu, C. Tian, X. Zhang, L. Wang and H. Fu, *Adv. Mater.*, 2018, **30**, 1704156.
- 19 W. Chen, J. Pei, C. T. He, J. Wan, H. Ren, Y. Wang, J. Dong, K. Wu, W. C. Cheong, J. Mao, X. Zheng, W. Yan, Z. Zhuang, C. Chen, Q. Peng, D. Wang and Y. Li, *Adv. Mater.*, 2018, **30**, 1800396.
- 20 Y. Xu, W. Tu, B. Zhang, S. Yin, Y. Huang, M. Kraft and R. Xu, *Adv. Mater.*, 2017, **29**, 1605957.
- 21 H. Li, P. Wen, Q. Li, C. Dun, J. Xing, C. Lu, S. Adhikari, L. Jiang, D. L. Carroll and S. M. Geyer, *Adv. Energy Mater.*, 2017, **7**, 1700513.
- 22 D. Senthil Raja, X. F. Chuah and S. Y. Lu, *Adv. Energy Mater.*, 2018, 1801065.
- 23 Y. Xin, X. Kan, L. Y. Gan and Z. Zhang, *ACS Nano*, 2017, **11**, 10303–10312.
- 24 S. Q. Liu, H. R. Wen, Y. Guo, Y. W. Zhu, X. Z. Fu, R. Sun and C. P. Wong, *Nano Energy*, 2018, **44**, 7–14.
- 25 Z. L. Wang, X. F. Hao, Z. Jiang, X. P. Sun, D. Xu, J. Wang, H. X. Zhong, F. L. Meng and X. B. Zhang, *J. Am. Chem. Soc.*, 2015, **137**, 15070–15073.
- 26 C. C. L. McCrory, S. Jung, J. C. Peters and T. F. Jaramillo, *J. Am. Chem. Soc.*, 2013, **135**, 16977–16987.
- 27 Y. Liu, X. Liang, L. Gu, Y. Zhang, G. D. Li, X. Zou and J. S. Chen, *Nat. Commun.*, 2018, **9**, 2609.
- 28 D. Merki, S. Fierro, H. Vrubel and X. Hu, *Chem. Sci.*, 2011, **2**, 1262–1267.
- 29 J. Tian, Q. Liu, A. M. Asiri and X. P. Sun, *J. Am. Chem. Soc.*, 2014, **136**, 7587–7590.
- 30 X. J. Liu, J. He, S. Z. Zhao, Y. P. Liu, Z. Zhao, J. Luo, G. Z. Hu, X. M. Sun and Y. Ding, *Nat. Commun.*, 2018, **9**, 4365.
- 31 X. J. Fan, Y. Y. Liu, S. Chen, J. J. Shi, J. J. Wang, A. Fan, W. Y. Zan, S. D. Li, W. A. Goddard and X. M. Zhang, *Nat. Commun.*, 2018, **9**, 1809.
- 32 Y. Sun, K. Xu, Z. Wei, H. Li, T. Zhang, X. Li, W. Cai, J. Ma, H. J. Fan and Y. Li, *Adv. Mater.*, 2018, **1802121**, 1802121.
- 33 L. L. Feng, G. Yu, Y. Wu, G. D. Li, H. Li, Y. Sun, T. Asefa, W. Chen and X. Zou, *J. Am. Chem. Soc.*, 2015, **137**, 14023–14026.
- 34 Y. Liu, Q. Li, R. Si, G. D. Li, W. Li, D. P. Liu, D. Wang, L. Sun, Y. Zhang and X. Zou, *Adv. Mater.*, 2017, **29**, 1606200.
- 35 H. Xu, J. Cao, C. Shan, B. Wang, P. Xi, W. Liu and Y. Tang, *Angew. Chem., Int. Ed.*, 2018, **57**, 8654–8658.
- 36 G. Kresse and J. Furthmüller, *Phys. Rev. B*, 1996, **54**, 11169.
- 37 G. Kresse and J. Furthmüller, *Comput. Mater. Sci.*, 1996, **6**, 15.
- 38 G. Kresse and D. Joubert, *Phys. Rev. B*, 1999, **59**, 1758.
- 39 J. P. Perdew, K. Burke and M. Ernzerhof, *Phys. Rev. Lett.*, 1996, **77**, 3865.

- 40 J. Klimeš, D. R. Bowler and A. Michaelides, *Phys. Rev. B Condens. Matter Mater. Phys.*, 2011, **83**, 195131.
- 41 J. Klimeš, D. R. Bowler and A. Michaelides, *J. Phys. Condens. Matter*, 2009, **22**, 022201.
- 42 G. Henkelman, B. P. Uberuaga and H. Jónsson, *J. Chem. Phys.*, 2000, **113**, 9901–9904.
- 43 J. K. Nørskov, T. Bligaard, A. Logadottir, J. R. Kitchin, J. G. Chen, S. Pandelov and U. Stimming, *J. Electrochem. Soc.*, 2005, **152**, J23.
- 44 K. Elbert, J. Hu, Z. Ma, Y. Zhang, G. Chen, W. An, P. Liu, H. S. Isaacs, R. R. Adzic and J. X. Wang, *ACS Catal.*, 2015, **5**, 6764–6772.
- 45 J. X. Wang, T. E. Springer and R. R. Adzic, *J. Electrochem. Soc.*, 2006, **153**, A1732–A1740.
- 46 J. X. Wang, T. E. Springer, P. Liu, M. Shao and R. R. Adzic, *J. Phys. Chem. C*, 2007, **111**, 12425–12433.
